# Supplementary material for: Transcriptomic analysis of fetal membranes reveals pathways involved in preterm birth
Source: BMC Med Genomics. 2019 Apr 1;12:53. doi: 10.1186/s12920-019-0498-3 (PMC6444860; doi:10.1186/s12920-019-0498-3)
Supplement: Supplementary file 3 — Table S3. Alignment statistics obtained by tophat2. Number of sequenced reads, total mapped reads and uniquely mapped reads for each of the 8 sequenced samples. (XLSX 4 kb) [file 12920_2019_498_MOESM3_ESM.xlsx]

## Sheet: Sheet1
Sample	Total reads	Total mapped reads	Percent mapped	Uniquely mapped Reads	Percent uniquely mapped
C01	59547019	55351967	92.96	54266450	91.13
C02	41730621	40612060	97.32	39799483	95.37
C03	46097365	44827668	97.25	43988573	95.43
C04	39886026	38714828	97.06	37956434	95.16
P01	38550493	31441879	81.56	30154534	78.22
P02	42545119	41238702	96.93	40376868	94.9
P03	58187494	56282003	96.73	54724954	94.05
P04	48337388	43267353	89.51	42323079	87.56
